# Supplementary material for: Assessment of the Microbiological Acceptability of White Cheese (Akkawi) in Lebanon and the Antimicrobial Resistance Profiles of Associated Escherichia coli
Source: MDPI journal article supplement (doi:10.3390/antibiotics12030610), 2023-03-19
Supplement: s1 [file s1]

Supplementary File

**Table S1: The breakpoints that were used to interpret antibiotic susceptibility of the *E. coli* isolated from the cheese samples.**

| Antibiotic agent                                 | Clinical Laboratory Standards Institute (CLSI)<br>M100, 2017<br>Diameter of the Zone of Inhibition (mm) |                                |               | European Committee on Antimicrobial<br>Susceptibility Testing (EUCAST) Version 13,<br>2023<br>Diameter of the Zone of Inhibition (mm) |                                |               |
|--------------------------------------------------|---------------------------------------------------------------------------------------------------------|--------------------------------|---------------|---------------------------------------------------------------------------------------------------------------------------------------|--------------------------------|---------------|
|                                                  | Susceptible (S)                                                                                         | Intermediate<br>Resistance (I) | Resistant (R) | Susceptible (S)                                                                                                                       | Intermediate<br>Resistance (I) | Resistant (R) |
| Ampicillin (10 µg)                               | ≥ 17                                                                                                    | 14–16                          | ≤ 13          | ≥ 14                                                                                                                                  | -                              | < 14          |
| Amoxicillin-Clavulanic acid (20/10 µg)           | ≥ 18                                                                                                    | 14–17                          | ≤ 13          | ≥ 19                                                                                                                                  | -                              | < 19          |
| Cefepime (30 µg)                                 | ≥ 25                                                                                                    | 19–24                          | ≤ 18          | ≥ 27                                                                                                                                  | -                              | < 24          |
| Cefotaxime (30 µg)                               | ≥ 26                                                                                                    | 23–25                          | ≤ 22          | ≥ 17                                                                                                                                  | -                              | < 17          |
| Cefixime (5 µg)                                  | ≥ 19                                                                                                    | 16–18                          | ≤ 15          | ≥ 20                                                                                                                                  | -                              | < 17          |
| Doripenem (10 µg)                                | ≥ 23                                                                                                    | 20–22                          | ≤ 19          | ≥ 24                                                                                                                                  | -                              | < 21          |
| Imipenem (10 µg)                                 | ≥ 23                                                                                                    | 20–22                          | ≤ 19          | ≥ 22                                                                                                                                  | -                              | < 19          |
| Meropenem (10 µg)                                | ≥ 23                                                                                                    | 20–22                          | ≤ 19          | ≥ 22                                                                                                                                  | -                              | < 22          |
| Gentamicin (10 µg)                               | ≥ 15                                                                                                    | 13–14                          | ≤ 12          | ≥ 17                                                                                                                                  | -                              | < 17          |
| Kanamycin (30 µg)                                | ≥ 18                                                                                                    | 14–17                          | ≤ 13          | -                                                                                                                                     | -                              | -             |
| Streptomycin (10 µg)                             | ≥ 15                                                                                                    | 13–14                          | ≤ 12          | -                                                                                                                                     | -                              | -             |
| Tetracycline (30 µg)                             | ≥ 15                                                                                                    | 12–14                          | ≤ 11          | ≥ 18                                                                                                                                  | -                              | < 18          |
| Ciprofloxacin (5 µg)                             | ≥ 21                                                                                                    | 16–20                          | ≤ 15          | ≥ 25                                                                                                                                  | 22–24                          | < 22          |
| Norfloxacin (10 µg)                              | ≥ 17                                                                                                    | 13–16                          | ≤ 12          | ≥ 24                                                                                                                                  | -                              | < 24          |
| Trimethoprim-sulfamethoxazole<br>(1.12/23.75 µg) | ≥ 16                                                                                                    | 11–15                          | ≤ 10          | ≥ 14                                                                                                                                  | -                              | < 11          |
| Chloramphenicol (30 µg)                          | ≥ 18                                                                                                    | 13–17                          | ≤ 12          | -                                                                                                                                     | -                              | -             |
